# KPGminer: A tool for retrieving pathway genes from KEGG pathway database

A. K. M. Azad

*School of Biotechnology and Biomolecular Sciences, University of NSW, Chancellery Walk, Kensington, 2033, Australia*

---

## Abstract

Pathway analysis is a very important aspect in computational systems biology as it serves as a crucial component in many computational pipelines. KEGG is one of the prominent databases that host pathway information associated with various organisms. In any pathway analysis pipelines, it is also important to collect and organize the pathway constituent genes for which a tool to automatically retrieve that would be a useful one to the practitioners. In this article, I present KPGminer, a tool that retrieves the constituent genes in KEGG pathways for various organisms and organizes that information suitable for many downstream pathway analysis pipelines. We exploited several KEGG web services using REST APIs, particularly GET and LIST methods to request for the information retrieval which is available for developers. Moreover, KPGminer can operate both for a particular pathway (single mode) or multiple pathways (batch mode). Next, we designed a crawler to extract necessary information from the response and generated outputs accordingly. KPGminer brings several key features including organism-specific and pathway-specific extraction of pathway genes from KEGG and always up-to-date information. Thus, we hope KPGminer can be a useful and effective tool to make downstream pathway analysis easier and faster. KPGminer is freely available for download from <https://sourceforge.net/projects/kpgminer/>.

*Keywords:* GSEA, KEGG pathway, pathway analysis, pathway genes, information retrieval, Web API, REST

---

## 1. Introduction

Biological pathway is defined as a collection of genes or proteins that are functionally related to each others to perform some biological activities such as signaling or regulatory activities. Some of the on-line pathway databases are KEGG [1], Reactome [2], Wikipathways [3] etc. where pathways related to signaling, metabolomic, cellular processes, diseases, genetic information are stored for various organism.

Pathway analysis is an important downstream component for many bioinformatics pipelines. One of the important aspects of a pathway analysis task set is to conduct enrichment test with already annotated pathways. This enrichment analysis include evaluating the enrichment of *de novo* gene sets (either computationally predicted or experimentally determined) with those already annotated pathways. Azad *et al.* designed a method called VToD [4] for identifying cancer-related gene modules, which were validated with known pathways from databases including KEGG [1] and GO terms [5] using gene set enrichment test. Another example of gene set enrichment analysis is to check the overlap of a particular set of interest e.g. differentially expressed genes with those annotated pathways. All of these enrichment tests require a set annotated pathways presented in the databases such as KEGG [1]. One of the sources to collect such annotated pathway sets is the Molecular Signatures Database (MSigDB) [6] which stores gene sets from well known pathway databases like KEGG [1] and Reactome [2]. But these gene sets are static and the pathway annotations are always updating. Hence, it is required to have a tool for retrieving up-to-date gene collections for users. Moreover, those collections aren't organism-specific.

In this article, I present a standalone tool called *KPGminer* that retrieves the pathway genes from KEGG [1] for all the organisms every time it runs. This provide always up-to-date and organisms specific information which can be stored in the local machine for conducting downstream pathway analysis using some statistical methods such as hyper-geometric tests. I hope, this tool can be very useful for the researchers and contribute to their bioinformatics pipelines.

## 2. Implementation

Figure 1 shows the main *KPGminer* interface. When user opens *KPGminer* tool it loads all the available organisms in KEGG database by making

36 HTTP web request via a web API call using REST protocol. This REST API  
 37 protocol is available in the KEGG website for the developers' use. Once, all  
 38 the organisms are loaded successfully, the main interface of KPGminer pops  
 39 up will a dropdown box populated with all the organism name. Next, user  
 40 has to select a particular organism for the that list, another HTTP web re-  
 41 quest takes place for retrieving all the pathways currently available in KEGG  
 42 database for that particular organism. The response of that request is then  
 43 parsed to get the list of those pathways and a listbox gets populated with  
 44 them. User can pick one or more pathways from that list which will be shown  
 45 in another listbox (called selection listbox).

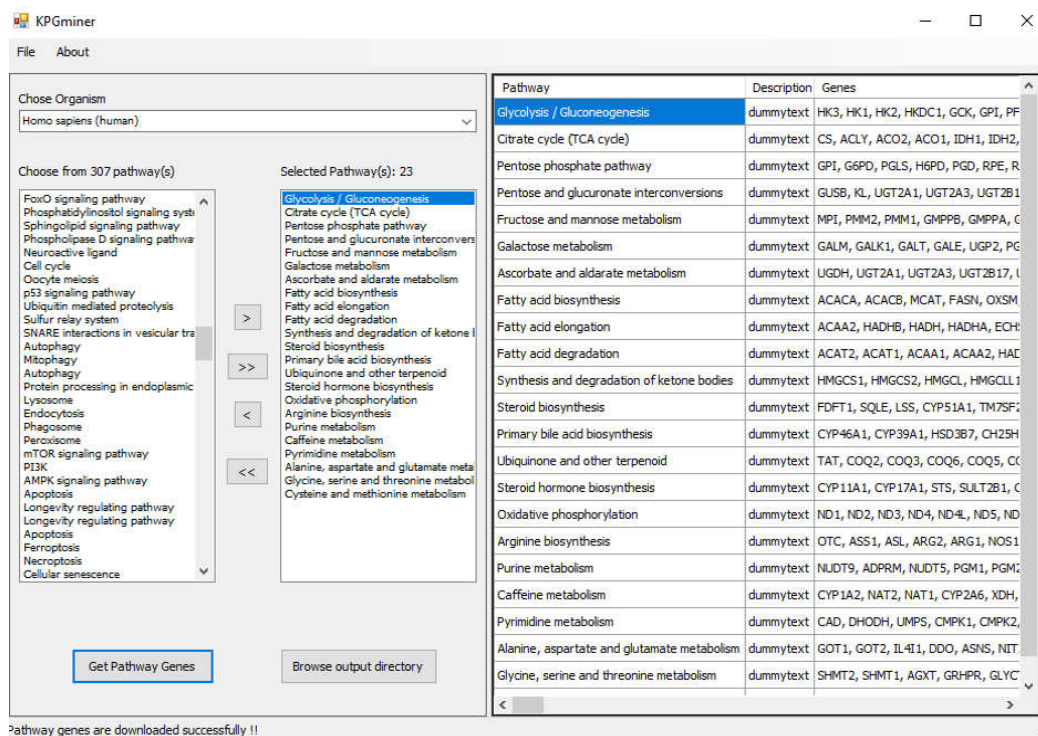

Figure 1: Main interface of KPGminer tool

46 To get all the pathway genes for those selected pathways, user press a but-  
 47 ton which makes another HTTP web request. KPGminer reports pathway  
 48 genes in single or batch mode depending on the number of selected pathways.  
 49 Once loaded all the pathway genes the results are shown in the right panel  
 50 on the main KPGminer interface. Finally, to all of these pathway genes are

51 can be saved in a file by clicking a button which asks a place to save that file  
52 in the local directory. The file is saved with a *.gmt* extension just as similar  
53 to the MSigDB for the convenience of users. A tooltip label keeps providing  
54 messages for every stages of KPGminer in retrieving pathway genes for se-  
55 lected pathway(s) for a particular organism. Table 1 shows the KPGminer  
56 metadata.

|                                 | Technology used         |
|---------------------------------|-------------------------|
| Version                         | v1.0.0                  |
| Language                        | C#.Net                  |
| Platform                        | Microsoft .Net platform |
| Operative systems               | Windows                 |
| HTTP web request                | REST API                |
| Information retrieval technique | In-house built crawler  |

Table 1: KPGminer Metadata

### 57 3. Discussion

58 KPGminer has several useful features. First, even though KEGG pro-  
59 vided necessary APIs for retrieving those information, a single platform to  
60 facilitate organism-specific and pathway-specific (single or batch mode) infor-  
61 mation retrieval may be advantageous for practitioners by abstracting their  
62 corresponding lower-level implementations. Second, while loading, KPG-  
63 miner starts requesting KEGG databases for pathway information, which  
64 indicates that it always brings the up-to-date information. Third, KPG-  
65 miner is a open source and free software that can help scientific communities  
66 to conduct pathway analysis required with KEGG pathway databases.

67 In this version of KGPminer, there is one limitation which is in batch-  
68 mode (for multiple pathways) operation, it creates HTTP web request for  
69 each pathways separately, which is a time consuming. But this limitation  
70 can be overcome by exploiting multi-threading approach by making each  
71 HTTP web request running in a single thread, which can be implemented  
72 in future versions of KPGminer. In future I also hope to extend this tool  
73 for retrieving information from other pathway databases including Reactome  
74 [2], Wikipathways [3] or GO [5] database. I hope KPGminer can be a very  
75 useful tool for the researchers in their pathway analysis.

#### 76 4. References

- 77 [1] M. Kanehisa, The KEGG database, *Novartis Found. Symp.* 247 (2002)  
78 91–101.
- 79 [2] D. Croft, A. F. Mundo, R. Haw, M. Milacic, J. Weiser, G. Wu, M. Caudy,  
80 P. Garapati, M. Gillespie, M. R. Kamdar, B. Jassal, S. Jupe, L. Matthews,  
81 B. May, S. Palatnik, K. Rothfels, V. Shamovsky, H. Song, M. Williams,  
82 E. Birney, H. Hermjakob, L. Stein, P. D’Eustachio, The Reactome path-  
83 way knowledgebase, *Nucleic Acids Res.* 42 (2014) D472–477.
- 84 [3] T. Kelder, M. P. van Iersel, K. Hanspers, M. Kutmon, B. R. Conklin,  
85 C. T. Evelo, A. R. Pico, *WikiPathways: building research communities*  
86 *on biological pathways*, *Nucleic Acids Res.* 40 (2012) D1301–1307.
- 87 [4] A. K. Azad, H. Lee, Voting-based cancer module identification by com-  
88 bining topological and data-driven properties, *PLoS ONE* 8 (2013)  
89 e70498.
- 90 [5] M. Ashburner, C. A. Ball, J. A. Blake, D. Botstein, H. Butler, J. M.  
91 Cherry, A. P. Davis, K. Dolinski, S. S. Dwight, J. T. Eppig, M. A. Harris,  
92 D. P. Hill, L. Issel-Tarver, A. Kasarskis, S. Lewis, J. C. Matese, J. E.  
93 Richardson, M. Ringwald, G. M. Rubin, G. Sherlock, Gene ontology:  
94 tool for the unification of biology. The Gene Ontology Consortium, *Nat.*  
95 *Genet.* 25 (2000) 25–29.
- 96 [6] A. Subramanian, P. Tamayo, V. K. Mootha, S. Mukherjee, B. L. Ebert,  
97 M. A. Gillette, A. Paulovich, S. L. Pomeroy, T. R. Golub, E. S. Lan-  
98 der, J. P. Mesirov, Gene set enrichment analysis: A knowledge-based  
99 approach for interpreting genome-wide expression profiles, *Proceedings*  
100 *of the National Academy of Sciences* 102 (2005) 15545–15550.

Chose Organism  
Homo sapiens (human) ▾

Choose from 307 pathway(s)

Selected Pathway(s): 23

FoxO signaling pathway  
 Phosphatidylinositol signaling syst  
 Sphingolipid signaling pathway  
 Phospholipase D signaling pathwa  
 Neuroactive ligand  
 Cell cycle  
 Oocyte meiosis  
 p53 signaling pathway  
 Ubiquitin mediated proteolysis  
 Sulfur relay system  
 SNARE interactions in vesicular tra  
 Autophagy  
 Mitophagy  
 Autophagy  
 Protein processing in endoplasmic  
 Lysosome  
 Endocytosis  
 Phagosome  
 Peroxisome  
 mTOR signaling pathway  
 PI3K  
 AMPK signaling pathway  
 Apoptosis  
 Longevity regulating pathway  
 Longevity regulating pathway  
 Apoptosis  
 Ferroptosis  
 Necroptosis  
 Cellular senescence

Glycolysis / Gluconeogenesis  
 Citrate cycle (TCA cycle)  
 Pentose phosphate pathway  
 Pentose and glucuronate interconvers  
 Fructose and mannose metabolism  
 Galactose metabolism  
 Ascorbate and aldarate metabolism  
 Fatty acid biosynthesis  
 Fatty acid elongation  
 Fatty acid degradation  
 Synthesis and degradation of ketone l  
 Steroid biosynthesis  
 Primary bile acid biosynthesis  
 Ubiquinone and other terpenoid  
 Steroid hormone biosynthesis  
 Oxidative phosphorylation  
 Arginine biosynthesis  
 Purine metabolism  
 Caffeine metabolism  
 Pyrimidine metabolism  
 Alanine, aspartate and glutamate meta  
 Glycine, serine and threonine metabol  
 Cysteine and methionine metabolism

>  
 >>  
 <  
 <<

| Pathway                                     | Description | Genes                              |
|---------------------------------------------|-------------|------------------------------------|
| Glycolysis / Gluconeogenesis                | dummytext   | HK3, HK1, HK2, HKDC1, GCK, GPI, PF |
| Citrate cycle (TCA cycle)                   | dummytext   | CS, ACLY, ACO2, ACO1, IDH1, IDH2,  |
| Pentose phosphate pathway                   | dummytext   | GPI, G6PD, PGLS, H6PD, PGD, RPE, R |
| Pentose and glucuronate interconversions    | dummytext   | GUSB, KL, UGT2A1, UGT2A3, UGT2B1   |
| Fructose and mannose metabolism             | dummytext   | MPI, PMM2, PMM1, GMPPB, GMPPA, C   |
| Galactose metabolism                        | dummytext   | GALM, GALK1, GALT, GALE, UGP2, PG  |
| Ascorbate and aldarate metabolism           | dummytext   | UGDH, UGT2A1, UGT2A3, UGT2B17, U   |
| Fatty acid biosynthesis                     | dummytext   | ACACA, ACACB, MCAT, FASN, OXSM,    |
| Fatty acid elongation                       | dummytext   | ACAA2, HADHB, HADH, HADHA, ECH:    |
| Fatty acid degradation                      | dummytext   | ACAT2, ACAT1, ACAA1, ACAA2, HAC    |
| Synthesis and degradation of ketone bodies  | dummytext   | HMGCS1, HMGCS2, HMGCL, HMGCLL1     |
| Steroid biosynthesis                        | dummytext   | FDFT1, SQLE, LSS, CYP51A1, TM7SF:  |
| Primary bile acid biosynthesis              | dummytext   | CYP46A1, CYP39A1, HSD3B7, CH25H    |
| Ubiquinone and other terpenoid              | dummytext   | TAT, COQ2, COQ3, COQ6, COQ5, CC    |
| Steroid hormone biosynthesis                | dummytext   | CYP11A1, CYP17A1, STS, SULT2B1, C  |
| Oxidative phosphorylation                   | dummytext   | ND1, ND2, ND3, ND4, ND4L, ND5, ND  |
| Arginine biosynthesis                       | dummytext   | OTC, ASS1, ASL, ARG2, ARG1, NOS1   |
| Purine metabolism                           | dummytext   | NUDT9, ADPRM, NUDT5, PGM1, PGM:    |
| Caffeine metabolism                         | dummytext   | CYP1A2, NAT2, NAT1, CYP2A6, XDH,   |
| Pyrimidine metabolism                       | dummytext   | CAD, DHODH, UMPS, CMPK1, CMPK2,    |
| Alanine, aspartate and glutamate metabolism | dummytext   | GOT1, GOT2, IL4I1, DDO, ASNS, NIT: |
| Glycine, serine and threonine metabolism    | dummytext   | SHMT2, SHMT1, AGXT, GRHPR, GLYC    |

Get Pathway Genes  
 Browse output directory
